# Supplementary material
Source: HighWire-hosted journal article supplement (https://bmjopenquality.bmj.com/content/12/1/e002062)

**Supplement Table 1:** Categorization of body systems and distribution of **symptoms at** index ED visit and **reported** MOIDs.

| Body System                  | Symptoms                                                                                                        | Diagnoses/Conditions (MOIDS & Final)                                                                                                                                                                                                                                           |
|------------------------------|-----------------------------------------------------------------------------------------------------------------|--------------------------------------------------------------------------------------------------------------------------------------------------------------------------------------------------------------------------------------------------------------------------------|
| Allergy/Immunology           | Hives                                                                                                           | Anaphylaxis                                                                                                                                                                                                                                                                    |
| Behavioral/Psychiatric       | Anxiety                                                                                                         | Conversion Disorder                                                                                                                                                                                                                                                            |
| Cardiology                   | Chest Pain<br>Syncope                                                                                           | Anomalous left coronary artery from the pulmonary artery<br>Arrhythmia<br>Bacterial Endocarditis<br>Cardiac tamponade<br>Coarctation of aorta<br>Hypoplastic heart<br>Myocarditis<br>Pericardial effusion<br>Pulmonary artery stenosis<br>Viral Myocarditis                    |
| Central Nervous System (CNS) | Headache<br>Seizure<br>Loss of sensation<br>Altered mental status                                               | Abscess, Intracranial<br>Acute flaccid myelitis<br>AV Malformation<br>Botulism<br>Chorea<br>Meningitis<br>Multiple Sclerosis<br>Oculogyric crisis<br>Pseudo tumor cerebri<br>Seizure<br>Shunt Malfunction<br>Stroke<br>Thrombosis of Basilar artery<br>Venous sinus thrombosis |
| Dermatology                  | Rash                                                                                                            | Impetigo<br>Non-Specific rash                                                                                                                                                                                                                                                  |
| Gastrointestinal (GI)        | Abdominal Pain<br>Vomiting<br>Constipation<br>Diarrhea<br>Blood in stool<br>Dark Stool<br>Difficulty swallowing | Acute Gastroenteritis<br>Appendicitis<br>Bowel Obstruction<br>Crohn's Disease<br>Cystic Mass<br>Foreign Body<br>GERD<br>Hirschsprung's Disease<br>Intestinal Invagination<br>Intussusception<br>Liver Failure                                                                  |

|                     |                                                                                                                                   |                                                                                                                                                                                                                                                                                                                                                                                                             |
|---------------------|-----------------------------------------------------------------------------------------------------------------------------------|-------------------------------------------------------------------------------------------------------------------------------------------------------------------------------------------------------------------------------------------------------------------------------------------------------------------------------------------------------------------------------------------------------------|
|                     |                                                                                                                                   | <p>Malrotation<br/> Meckel Diverticulum<br/> Malfunction of G-tube<br/> Necrotizing enterocolitis<br/> Pancreatitis<br/> Periappendicial abscess<br/> Pyloric Stenosis<br/> Volvulus</p>                                                                                                                                                                                                                    |
| Genitourinary (GU)  | <p>Dysuria<br/> Flank pain<br/> Hematuria<br/> Infrequent menses<br/> Proteinuria<br/> Testicular pain<br/> Vaginal discharge</p> | <p>Abscess pelvic<br/> Acute renal failure<br/> Chlamydia<br/> Hematocolpos<br/> Hemolytic uremic syndrome<br/> Hyperkalemia<br/> Imperforate hymen<br/> Nephrotic syndrome<br/> Ovarian torsion<br/> Pregnancy, intrauterine<br/> Single kidney renal failure<br/> Testicular torsion<br/> Urachal cyst<br/> Urinary Tract Infection (UTI)</p>                                                             |
| Hematology/Oncology | <p>Anemia<br/> Nosebleed</p>                                                                                                      | <p>Acute lymphoblastic leukemia<br/> Acute Myeloid Leukemia<br/> Aplastic anemia crisis<br/> Hemophagocytic lymphohistiocytosis<br/> Burkitt's lymphoma<br/> Cancer of the ovaries<br/> Ewing Sarcoma<br/> Immune thrombocytopenia<br/> Neutropenia<br/> Henoch-Schonlein purpura<br/> Splenic sequestration<br/> Tumor Abdomen<br/> Tumor anterior mediastinum<br/> Tumor Brain<br/> Tumor spinal cord</p> |
| Infection           | <p>Fever<br/> Congestion<br/> Cough<br/> Runny nose<br/> Sore throat</p>                                                          | <p>Abscess Abdominal<br/> Abscess Cerebral<br/> Abscess Neck<br/> Abscess Retropharyngeal<br/> Abscess Thigh<br/> Bacterial meningitis<br/> Clostridium Perfringens</p>                                                                                                                                                                                                                                     |

|                 |                                                                                                                                                |                                                                                                                                                                                                                                                              |
|-----------------|------------------------------------------------------------------------------------------------------------------------------------------------|--------------------------------------------------------------------------------------------------------------------------------------------------------------------------------------------------------------------------------------------------------------|
|                 |                                                                                                                                                | Disseminated HSV sepsis<br>Lemierre's disease<br>Lyme disease<br>Malaria<br>Mastoiditis<br>Measles<br>Osteomyelitis<br>Peripheral neuropathy<br>Pertussis<br>Sepsis<br>Septic arthritis<br>Septic Hip<br>Syphilis<br>Toxic shock syndrome<br>Wound Infection |
| Inflammation    | Knee pain<br>Limp<br>Shoulder pain                                                                                                             | Kawasaki disease<br>Transient synovitis of the hip                                                                                                                                                                                                           |
| Musculoskeletal | Arm pain<br>Back pain<br>Elbow Swelling<br>Leg pain<br>Limp<br>Swelling of chest                                                               | Pectus carinatum<br>Perthes disease<br>Slipped Capital Femoral Epiphysis (SCFE)                                                                                                                                                                              |
| Ophthalmology   | Eye swelling<br>Red eye                                                                                                                        | Conjunctivitis<br>Keratitis                                                                                                                                                                                                                                  |
| Respiratory     | Respiratory distress<br>Cough<br>Difficulty breathing<br>Difficulty swallowing<br>Noisy breathing<br>Stridor<br>Wheezing                       | Pneumonia<br>Airway Foreign body<br>Pulmonary embolism<br>Bacterial tracheitis<br>Pneumothorax<br>Aspiration Pneumonia<br>Empyema<br>Bronchiolitis<br>Abscess Retropharyngeal                                                                                |
| Trauma          | Arm pain<br>Back pain<br>Bruise<br>Chest injury<br>Contusion<br>Fall<br>Head injury<br>Knee pain<br>Laceration<br>Limp<br>Motor vehicle injury | Fracture Clavicular<br>Fracture Elbow including supracondylar fracture<br>Fracture Femur<br>Fracture Hip<br>Fracture Radius<br>Fracture Radius Ulna<br>Fracture Skull<br>Fracture Tibia<br>Fracture Wrist<br>Fracture Humerus                                |

|       |                                                                                  |                                                                                                                  |
|-------|----------------------------------------------------------------------------------|------------------------------------------------------------------------------------------------------------------|
|       | Neck pain<br>Pain<br>Shoulder Pain                                               | Laceration<br>Liver Laceration<br>Non accidental trauma (NAT)<br>Retained Foreign body<br>Supracondylar fracture |
| Other | Abnormal blood test<br>Choking<br>Fussiness<br>Irritability<br>Persistent crying | Rickets<br>Hypernatremic dehydration                                                                             |

Supplement Table 2: Distribution of Contributory factors for the entire study and stratified by participating networks

|                                                                   | All networks combined <i>n</i> (%) | PECARN ( <i>n</i> =143, 35.2%) | PEMCRC ( <i>n</i> =122, 30.1%) | PERC ( <i>n</i> =67, 16.7%) | PERUKI ( <i>n</i> =37, 9.1%) | RISeuP ( <i>n</i> =28, 6.9%) | REPEM ( <i>n</i> =9, 2.2%) |
|-------------------------------------------------------------------|------------------------------------|--------------------------------|--------------------------------|-----------------------------|------------------------------|------------------------------|----------------------------|
| <b>Patient-Provider Encounter</b>                                 | 240 (59.1%)                        | 97 (67.8%)                     | 61 (50.0%)                     | 45 (67.2%)                  | 24 (64.9%)                   | 10 (35.7%)                   | 3 (33.3%)                  |
| a. Problems with history                                          | 166 (69.1%)                        | 66 (68.0%)                     | 48 (94.1%)                     | 33 (73.3%)                  | 14 (58.3%)                   | 4 (40.0%)                    | 1 (33.3%)                  |
| • Incomplete or inadequate history                                | 84 (35.0%)                         | 36 (37.1%)                     | 21 (34.4%)                     | 15 (33.3%)                  | 8 (33.3%)                    | 3 (30.0%)                    | 1 (33.3%)                  |
| • Misinterpreted or ignored physical historical findings          | 82 (34.1%)                         | 30 (30.9%)                     | 27 (44.2%)                     | 18 (40.0%)                  | 6 (25.0%)                    | 1 (10.0%)                    | 0 (0.0%)                   |
| b. Problems with physical examination                             | 188 (78.3%)                        | 70 (72.2%)                     | 47 (77.0%)                     | 40 (88.8%)                  | 20 (83.3%)                   | 10 (100.0%)                  | 1 (33.3%)                  |
| • Incomplete or inadequate physical exam                          | 77 (32.1%)                         | 33 (34.0%)                     | 16 (26.2%)                     | 16 (35.5%)                  | 9 (37.5%)                    | 2 (20.0%)                    | 1 (33.3%)                  |
| • Historical findings misinterpreted or ignored                   | 111 (46.3%)                        | 37 (38.1%)                     | 31 (50.8%)                     | 24 (53.3%)                  | 11 (45.8%)                   | 8 (80.0%)                    | 0 (0.0%)                   |
| c. Failure to review previous documentation                       | 14 (5.8%)                          | 3 (3.1%)                       | 6 (9.8%)                       | 2 (4.4%)                    | 1 (4.1%)                     | 1 (10.0%)                    | 1 (33.3%)                  |
| d. Failed to order an indicated diagnostic test                   | 94 (39.2%)                         | 32 (32.9%)                     | 25 (40.9%)                     | 20 (44.4%)                  | 12 (50.0%)                   | 4 (40.0%)                    | 1 (33.3%)                  |
| e. Other (such as unnecessary procedure/tests performed)          | 41 (17.1%)                         | 18 (18.5%)                     | 10 (16.3%)                     | 6 (13.3%)                   | 6 (25.0%)                    | 1 (10.0%)                    | 0 (0.0%)                   |
| <b>Diagnostic Tests</b>                                           | 155 (38.2%)                        | 48 (33.6%)                     | 58 (47.5%)                     | 30 (44.8%)                  | 9 (24.3%)                    | 5 (17.9%)                    | 5 (55.6%)                  |
| a. not performed at all                                           | 41 (26.4%)                         | 12 (25.0%)                     | 11 (18.9%)                     | 9 (30.0%)                   | 3 (33.3%)                    | 4 (80.0%)                    | 2 (40.0%)                  |
| b. not performed correctly                                        | 5 (3.2%)                           | 1 (2.0%)                       | 2 (3.4%)                       | 0 (0.0%)                    | 0 (0.0%)                     | 0 (0.0%)                     | 2 (40.0%)                  |
| c. not interpreted correctly                                      | 35 (22.5%)                         | 9 (18.7%)                      | 12 (20.6%)                     | 12 (40.0%)                  | 1 (11.1%)                    | 1 (20.0%)                    | 0 (0.0%)                   |
| d. Misidentification of sample                                    | 0 (0.0%)                           | 0 (0.0%)                       | 0 (0.0%)                       | 0 (0.0%)                    | 0 (0.0%)                     | 0 (0.0%)                     | 0 (0.0%)                   |
| e. Misinterpretation of test results                              | 26 (16.7%)                         | 14 (29.1%)                     | 6 (10.3%)                      | 3 (10.0%)                   | 1 (11.1%)                    | 0 (0.0%)                     | 2 (40.0%)                  |
| f. Other                                                          | 51 (32.9%)                         | 15 (31.2%)                     | 24 (41.3%)                     | 8 (26.6%)                   | 3 (33.3%)                    | 1 (20.0%)                    | 0 (0.0%)                   |
| <b>Patient-Related Factors</b>                                    | 104 (25.6%)                        | 39 (27.3%)                     | 27 (22.1%)                     | 19 (28.4%)                  | 11 (29.7%)                   | 4 (14.3%)                    | 4 (44.4%)                  |
| a. Delay in seeking care                                          | 2 (1.9%)                           | 0 (0.0%)                       | 1 (3.7%)                       | 0 (0.0%)                    | 0 (0.0%)                     | 0 (0.0%)                     | 1 (25.0%)                  |
| b. Language barriers                                              | 12 (11.5%)                         | 2 (5.1%)                       | 5 (18.5%)                      | 2 (10.5%)                   | 3 (27.2%)                    | 0 (0.0%)                     | 0 (0.0%)                   |
| c. Caregiver factors (absent, adversarial, or incomplete history) | 47 (45.1%)                         | 17 (43.5%)                     | 13 (48.1%)                     | 11 (57.8%)                  | 2 (18.1%)                    | 1 (25.0%)                    | 3 (75.0%)                  |
| d. Left against medical advice                                    | 1 (0.9%)                           | 1 (2.5%)                       | 0 (0.0%)                       | 0 (0.0%)                    | 0 (0.0%)                     | 0 (0.0%)                     | 0 (0.0%)                   |
| e. Other                                                          | 53 (50.9%)                         | 19 (48.7%)                     | 12 (44.4%)                     | 9 (47.3%)                   | 9 (81.8%)                    | 3 (75.0%)                    | 1 (25.0%)                  |
| <b>Follow-Up Tracking</b>                                         | 48 (11.8%)                         | 13 (9.1%)                      | 13 (10.7%)                     | 8 (11.9%)                   | 2 (5.4%)                     | 10 (35.7%)                   | 2 (22.2%)                  |
| a. Problems with follow-up of abnormal diagnostic test results    | 14 (29.1%)                         | 3 (23.0%)                      | 3 (23.0%)                      | 4 (50.0%)                   | 1 (50.0%)                    | 2 (20.0%)                    | 1 (50.0%)                  |

|                                                                                                                                                                |                    |                   |                   |                   |                   |                   |                  |
|----------------------------------------------------------------------------------------------------------------------------------------------------------------|--------------------|-------------------|-------------------|-------------------|-------------------|-------------------|------------------|
| b. Problems with scheduling of appropriate and/or timely follow-up visits/referral                                                                             | 17 (35.4%)         | 1 (7.6%)          | 5 (38.4%)         | 3 (37.5%)         | 0 (0.0%)          | 6 (60.0%)         | 2 (100.0%)       |
| c. Other                                                                                                                                                       | 19 (39.5%)         | 8 (61.5%)         | 5 (38.4%)         | 1 (12.5%)         | 1 (50.0%)         | 4 (40.0%)         | 0 (0.0%)         |
| <b>Consultations</b>                                                                                                                                           | <b>45 (11.1%)</b>  | <b>10 (7.0%)</b>  | <b>16 (13.1%)</b> | <b>5 (7.5%)</b>   | <b>10 (27.0%)</b> | <b>3 (10.7%)</b>  | <b>1 (11.1%)</b> |
| a. Problems (lack of access or delays) in obtaining consultation                                                                                               | 10 (22.2%)         | 4 (40.0%)         | 2 (12.5%)         | 1 (20.0%)         | 0 (0.0%)          | 2 (66.6%)         | 1 (100.0%)       |
| b. Consultant or an "experienced expert" did not lay hands on patient                                                                                          | 16 (35.5%)         | 3 (30.0%)         | 6 (37.5%)         | 0 (0.0%)          | 6 (60.0%)         | 1 (33.3%)         | 0 (0.0%)         |
| c. Communication breakdown/Lack of appropriate response from consultants in the ED                                                                             | 14 (31.1%)         | 3 (30.0%)         | 3 (18.7%)         | 2 (40.0%)         | 6 (60.0%)         | 0 (0.0%)          | 0 (0.0%)         |
| d. Contradictory recommendations from several members of same service                                                                                          | 2 (4.4%)           | 0 (0.0%)          | 2 (12.5%)         | 0 (0.0%)          | 0 (0.0%)          | 0 (0.0%)          | 0 (0.0%)         |
| e. Contradictory recommendations from different consulting services                                                                                            | 6 (13.3%)          | 0 (0.0%)          | 3 (18.7%)         | 0 (0.0%)          | 1 (10.0%)         | 2 (66.6%)         | 0 (0.0%)         |
| <b>Miscellaneous Factors</b>                                                                                                                                   | <b>133 (32.8%)</b> | <b>45 (31.5%)</b> | <b>42 (34.4%)</b> | <b>20 (29.9%)</b> | <b>11 (29.7%)</b> | <b>12 (42.9%)</b> | <b>3 (33.3%)</b> |
| a. Workload                                                                                                                                                    | 47 (35.3%)         | 14 (31.1%)        | 10 (23.8%)        | 12 (60.0%)        | 4 (36.3%)         | 8 (66.6%)         | 0 (0.0%)         |
| • Workload was too high                                                                                                                                        | 47 (35.3%)         | 14 (31.1%)        | 10 (23.8%)        | 12 (60.0%)        | 4 (36.3%)         | 7 (58.3%)         | 0 (0.0%)         |
| • Workload was too low                                                                                                                                         | 0 (0.0%)           | 0 (0.0%)          | 0 (0.0%)          | 0 (0.0%)          | 0 (0.0%)          | 1 (8.3%)          | 0 (0.0%)         |
| b. Lack of resources – such as less nursing, respiratory therapists, etc.                                                                                      | 12 (9.0%)          | 1 (2.2%)          | 5 (11.9%)         | 3 (15.0%)         | 3 (27.2%)         | 0 (0.0%)          | 0 (0.0%)         |
| c. Workload was complex (high case severity mix in the ED)                                                                                                     | 33 (24.8%)         | 7 (15.5%)         | 14 (33.3%)        | 6 (30.0%)         | 2 (18.1%)         | 3 (25.0%)         | 1 (33.3%)        |
| d. Patients who arrive with a "known" diagnosis or have been worked up for a diagnosis prior to the index ED visit, i.e. have been assigned a diagnostic label | 59 (44.3%)         | 20 (44.4%)        | 18 (42.8%)        | 8 (40.0%)         | 6 (54.5%)         | 6 (50.0%)         | 1 (33.3%)        |
| e. Distractions – too many phone calls/interruptions, etc.                                                                                                     | 22 (16.5%)         | 7 (15.5%)         | 6 (14.2%)         | 3 (15.0%)         | 3 (27.2%)         | 3 (25.0%)         | 0 (0.0%)         |
| f. Institutional practices and policies                                                                                                                        | 14 (10.5%)         | 4 (8.8%)          | 2 (4.7%)          | 3 (15.0%)         | 1 (9.0%)          | 2 (16.6%)         | 2 (66.6%)        |
| g. Legal factors                                                                                                                                               | 0 (0.0%)           | 0 (0.0%)          | 0 (0.0%)          | 0 (0.0%)          | 0 (0.0%)          | 0 (0.0%)          | 0 (0.0%)         |

The gray highlighted rows are the sum of participants who have selected the primary contributing factors for the MOID. For each primary contributing factor, the respondent had the option of specifying multiple sub-categories.

Within each column, percentages do not sum to 100% because participants could select more than one response.

**Supplement Figure 1: Impact (harm) of MOID on the patient**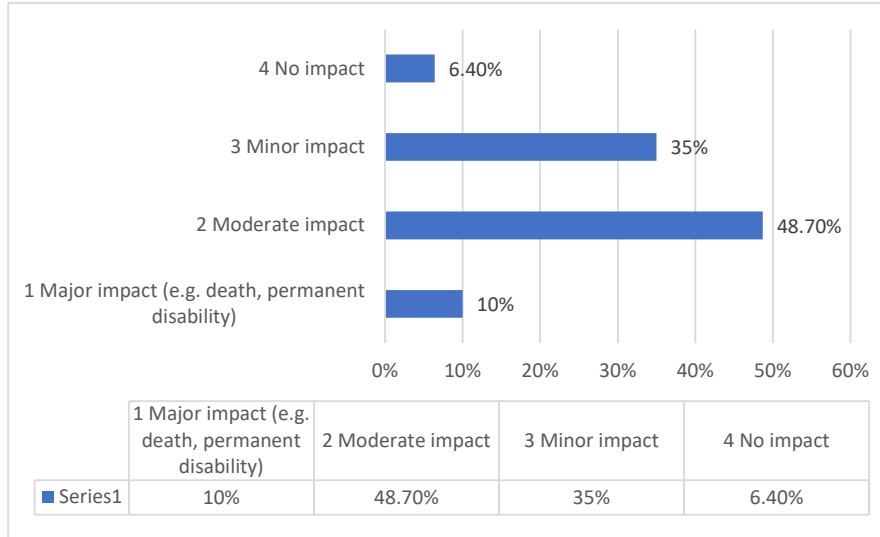

Supplement: inline-supplementary-material-1 [file inline-supplementary-material-1.pdf]
